# Supplementary material for: Strain-Mediated Magneto-Electric Effects in Coaxial Nanofibers of Y/W-Type Hexagonal Ferrites and Ferroelectrics
Source: MDPI journal article supplement (doi:10.3390/jcs5100268), 2021-10-13
Supplement: s1 [file s1]

Archive with 1 entries (1 files):
- jcs-1378533-supplementary.pdf
