# Supplementary material for: Strain-Mediated Magneto-Electric Effects in Coaxial Nanofibers of Y/W-Type Hexagonal Ferrites and Ferroelectrics
Source: MDPI journal article supplement (doi:10.3390/jcs5100268), 2021-10-13
Supplement: s1 [file s1 › jcs-1378533-supplementary.pdf]

# Supplementary Materials: Strain-Mediated Magneto-Electric Effects in Coaxial Nanofibers of Y/W-Type Hexagonal Ferrites and Ferroelectrics

Ying Liu, Peng Zhou, Bingfeng Ge, Jiahui Liu, Jitao Zhang, Wei Zhang, Tianjing Zhang and Gopalan Srinivasan

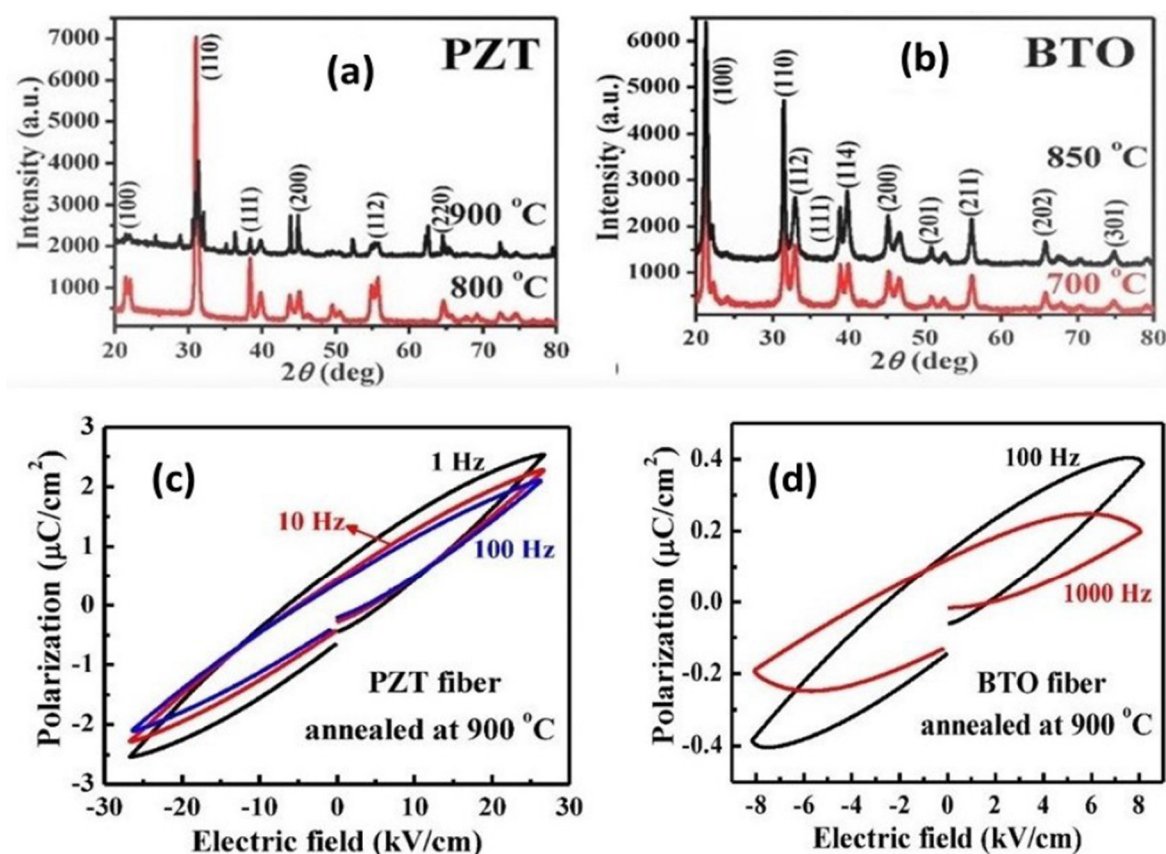

**Figure S1.** X-ray diffraction and P vs E for electrospun fibers of pure PZT and barium titanate and annealed at 900 °C.

PZT core Zn<sub>2</sub>Y shell 14kV, 900 °C

Zn<sub>2</sub>W core PZT shell 14kV, 900 °C

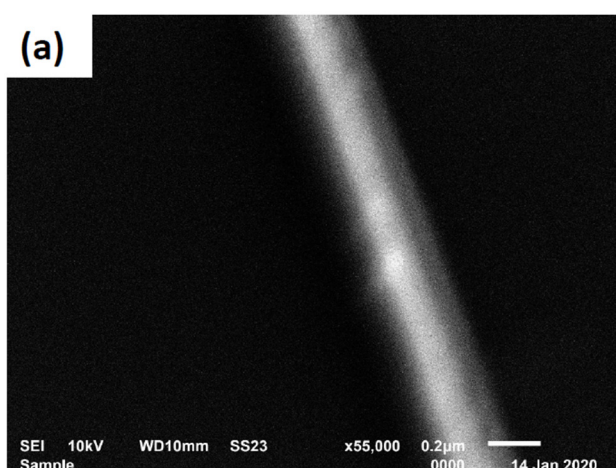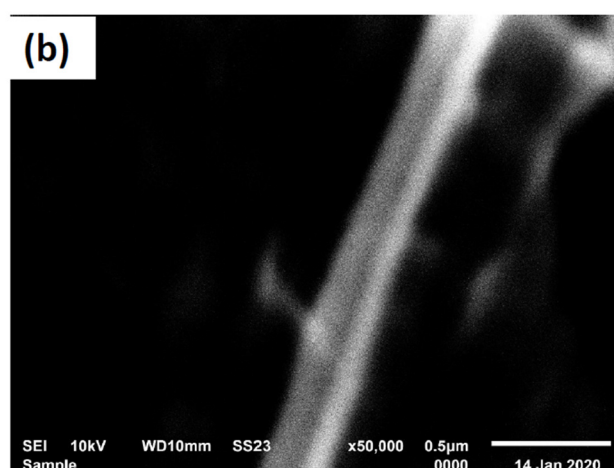

**Figure S2.** SEM images for fibers of (a) PZT core-Zn<sub>2</sub>Y shell and (b) Zn<sub>2</sub>W core-PZT shell.

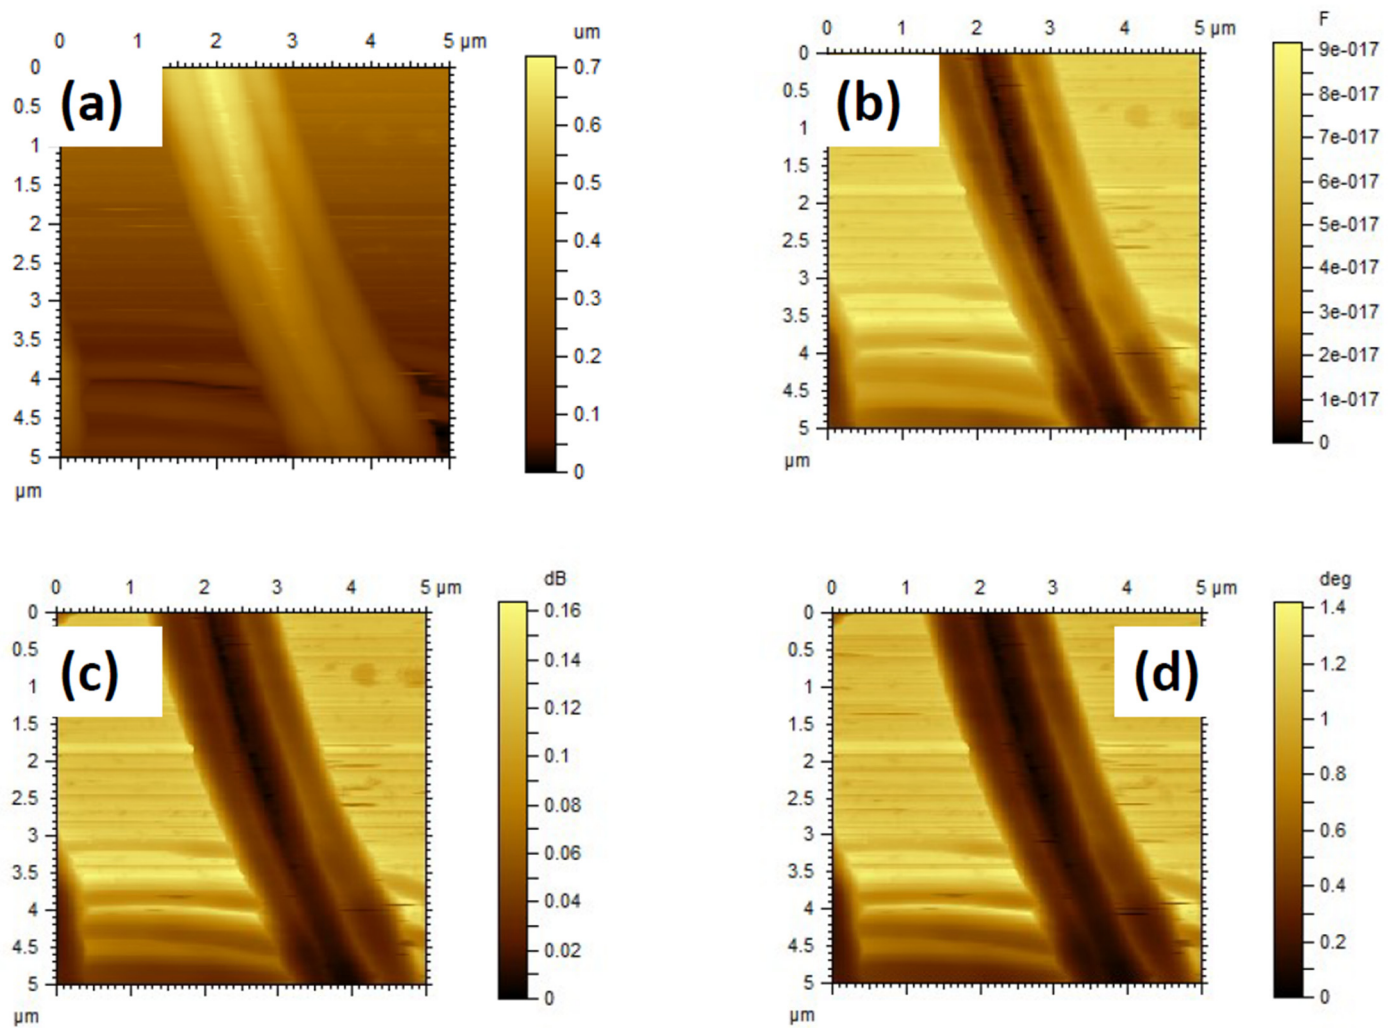

**Figure S3.** SMM images showing (a) topography, (b) capacitance, (c) S11 amplitude and (d) S11 phase at 15.6 GHz for fibers of BTO core and Co<sub>2</sub>W shell.

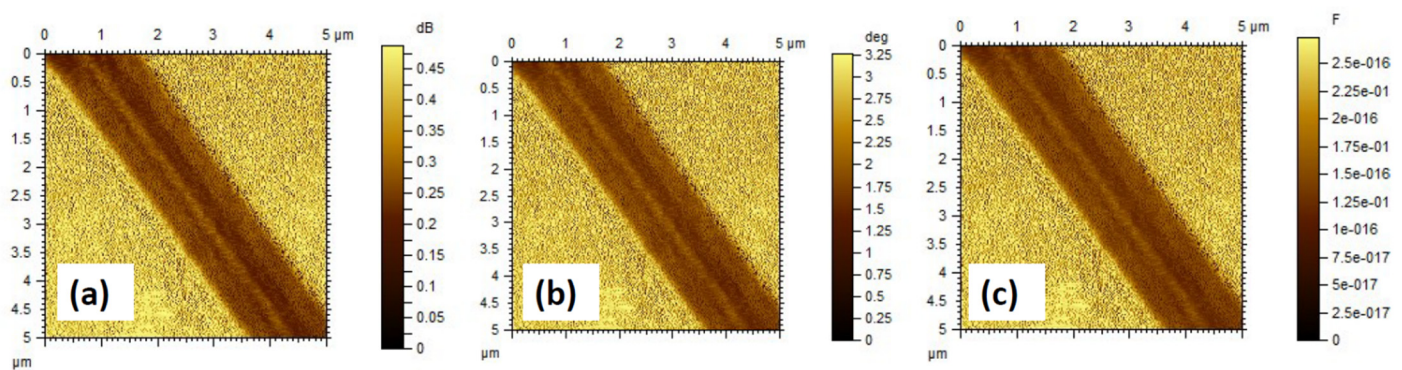

**Figure S4.** SMM images showing (a) topography, (b) S11 phase and (c) capacitance at 15.6 GHz for fibers of Co<sub>2</sub>W core and PZT shell.

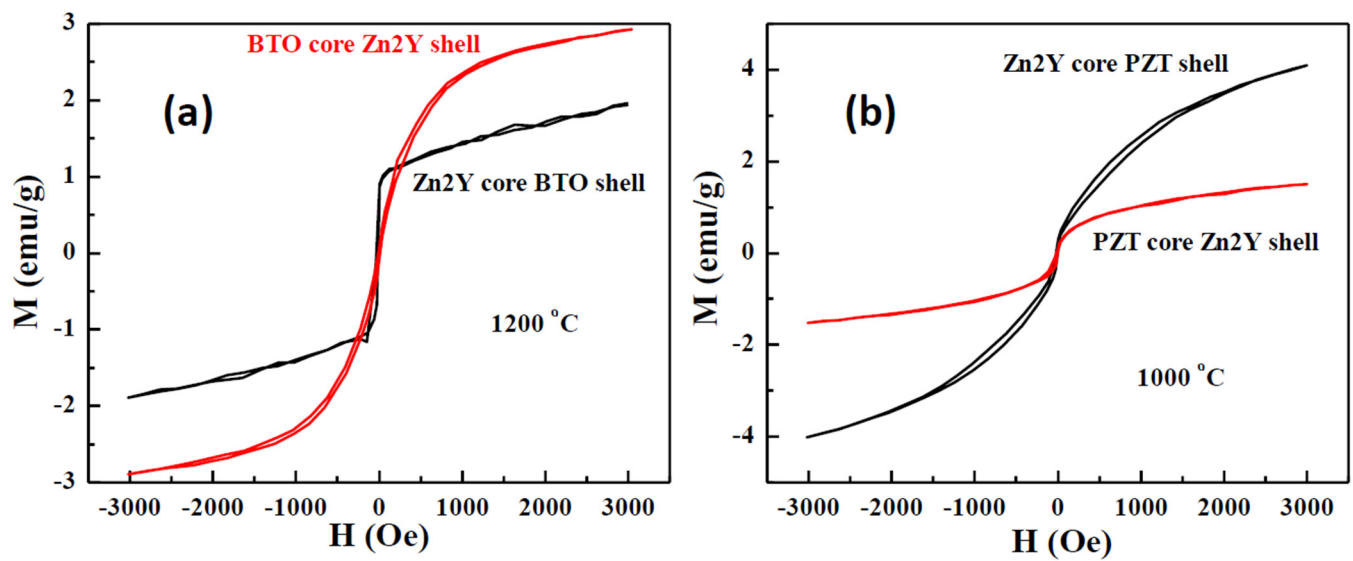

Figure S5. Room temperature magnetization  $M$  versus magnetic field  $H$  for (a) Zn<sub>2</sub>Y-BTO fibers and (b) Zn<sub>2</sub>Y-PZT fibers.

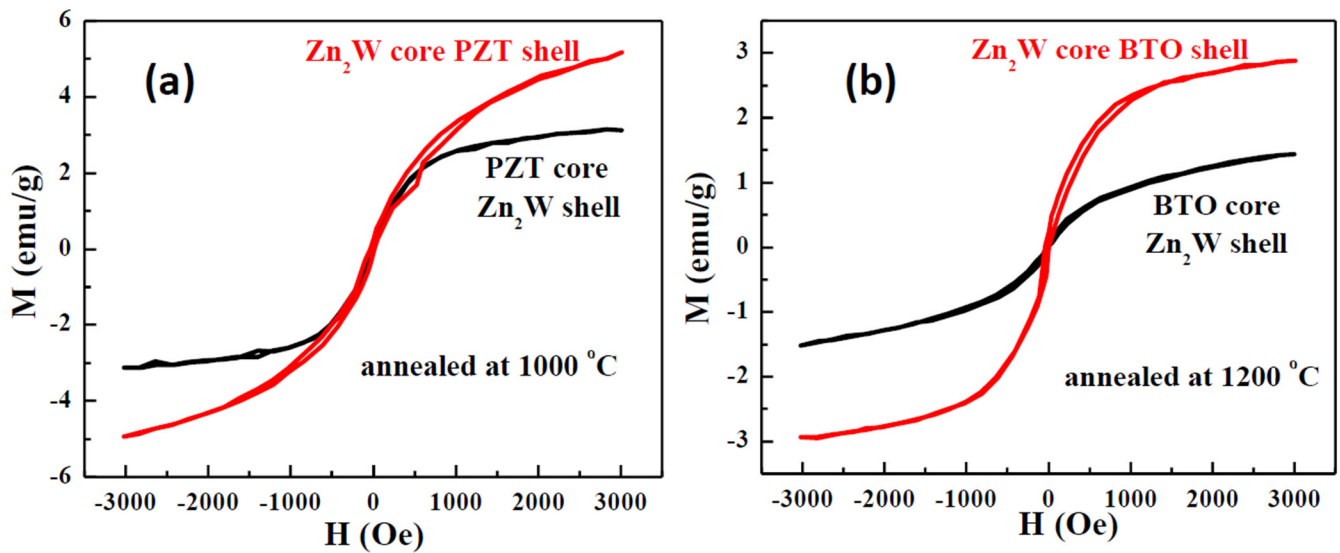

Figure S6. Room temperature magnetization  $M$  versus magnetic field  $H$  for (a) Zn<sub>2</sub>W-PZT fibers and (b) Zn<sub>2</sub>W-BTO fibers.

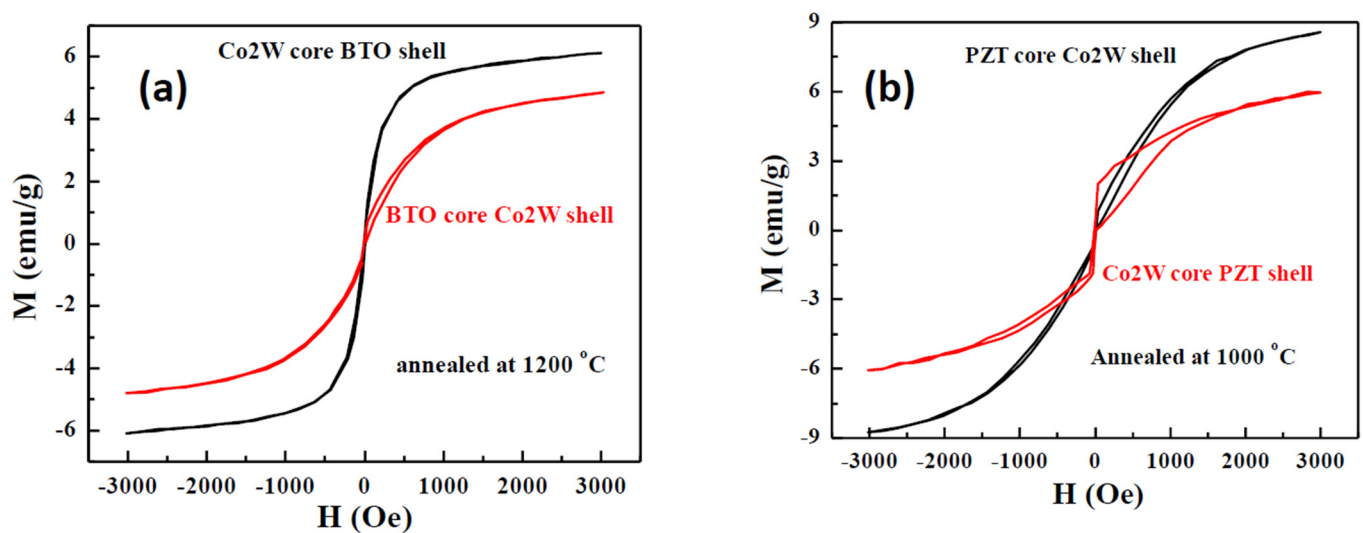

Figure S7. Room temperature magnetization  $M$  versus magnetic field  $H$  for (a) Co<sub>2</sub>W-BTO fibers and (b) Co<sub>2</sub>W-PZT fibers.

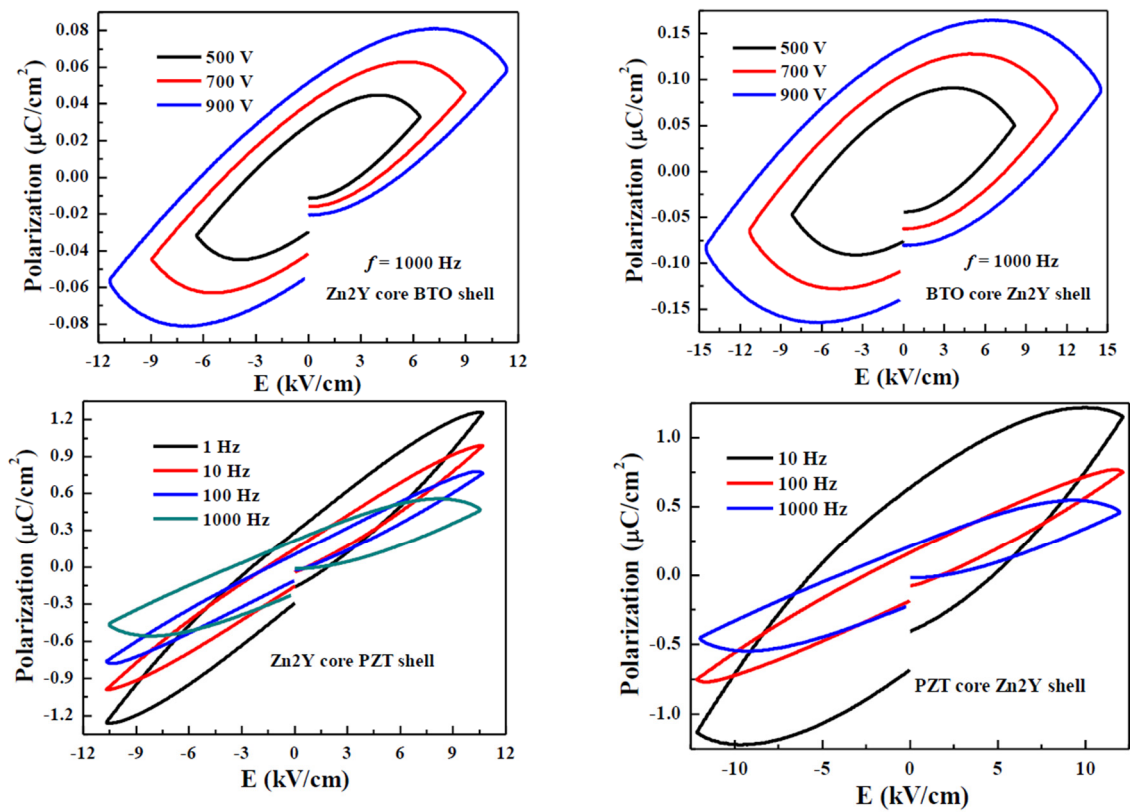

Figure S8. Polarization vs electric field for fibers of Zn<sub>2</sub>Y and BTO or PTZ.

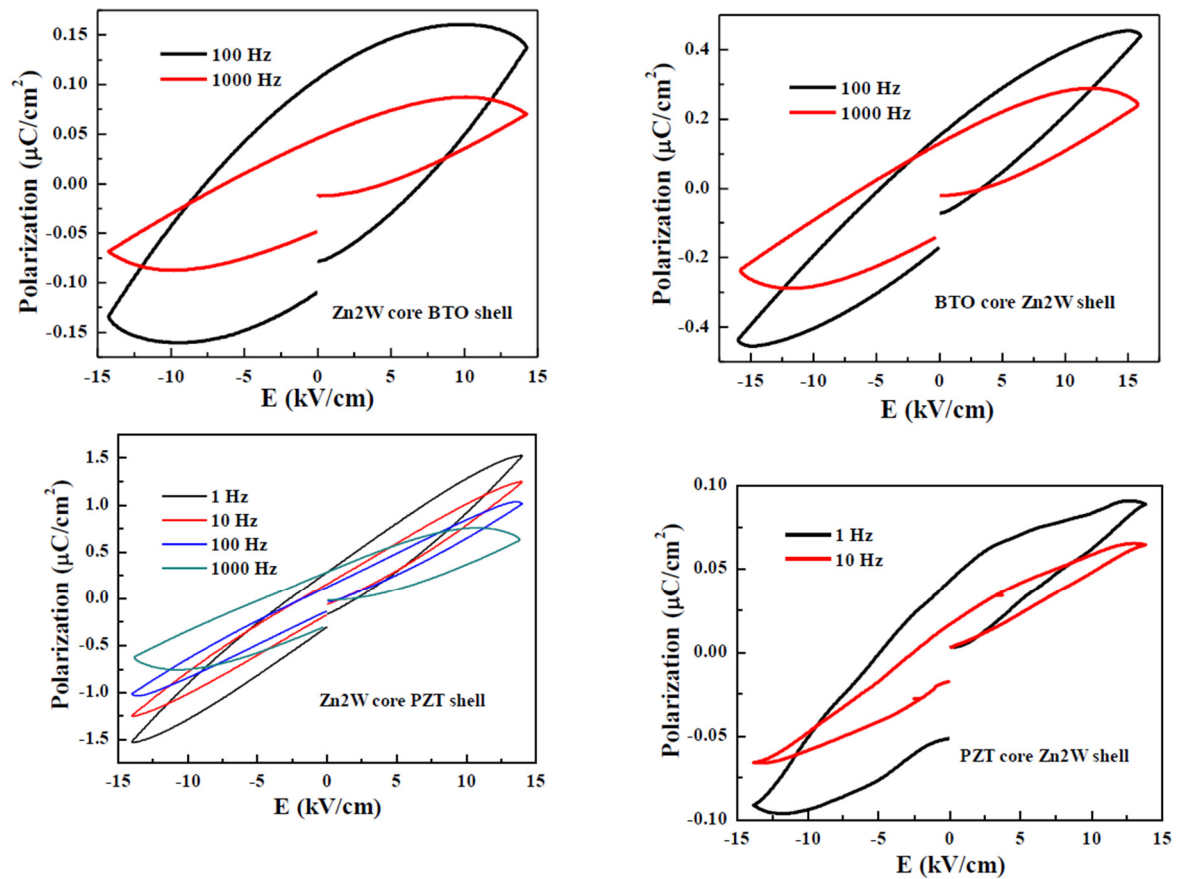

Figure S9. Polarization vs electric field for fibers of Zn<sub>2</sub>W and BTO or PTZ.

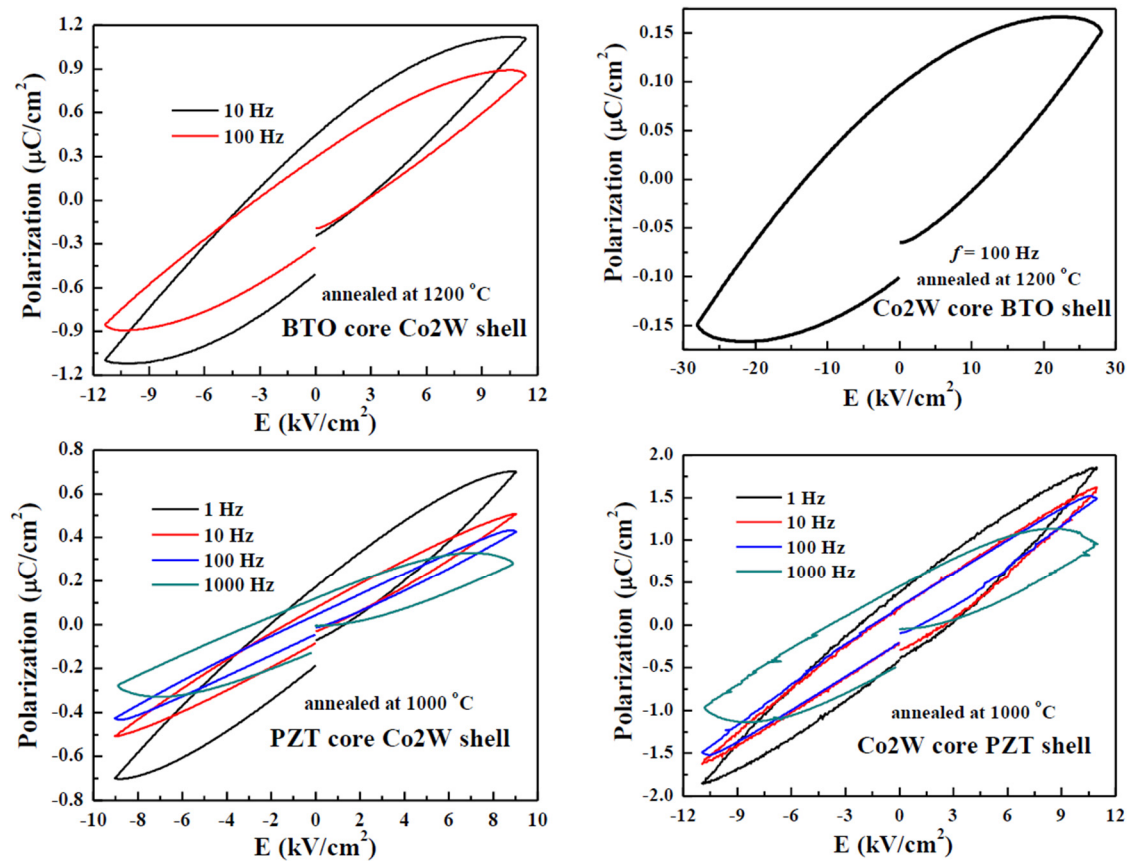

Figure S10. Polarization vs electric field for fibers of Co2W and BTO or PZT.

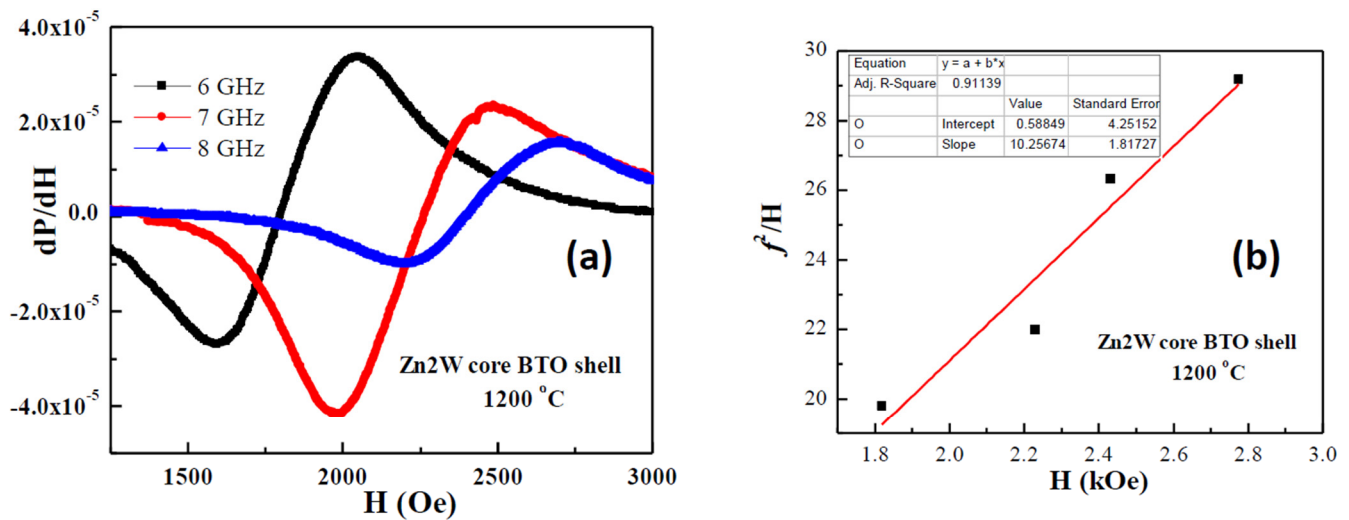

$$\gamma = 3.2 \text{ GHz/kOe},$$

$$4\pi M_{\text{eff}} = 0.057 \text{ kOe}$$

Figure S11. (a) Ferromagnetic resonance profiles for a disk of annealed fibers of Zn2W and BTO. (b) Data and fitting of the resonance frequency and resonance condition in Eq.(2). Magnetic parameters obtained from the fitting are  $\gamma = 3.2 \text{ GHz/kOe}$  and  $4\pi M_{\text{eff}} = 0.057 \text{ kOe}$ .
